# Supplementary material for: Remarkably durable platinum cluster supported on multi-walled carbon nanotubes with high performance in an anhydrous polymer electrolyte fuel cell
Source: Royal Society of Chemistry journal article supplement (doi:10.1039/c6ra19487g), 2016-01-01
Supplement: c6ra19487g1.pdf [file c6ra19487g1.pdf]

## **Supporting Information**

**for**

### **Remarkably Durable Platinum Cluster Supported on Multi-walled Carbon Nanotubes with High Performance in Anhydrous Polymer Electrolyte Fuel Cell**

Zehui Yang<sup>a</sup>, Xinxin Yu<sup>a</sup>, Yunfeng Zhang<sup>a\*</sup> and Guodong Xu<sup>a</sup>

*<sup>a</sup>Sustainable Energy Laboratory, Faculty of Materials Science and Chemistry, China*

*University of Geosciences Wuhan, 388 Lumo RD, Wuhan, 430074, China*

E-mail: Zhangyf329@gmail.com

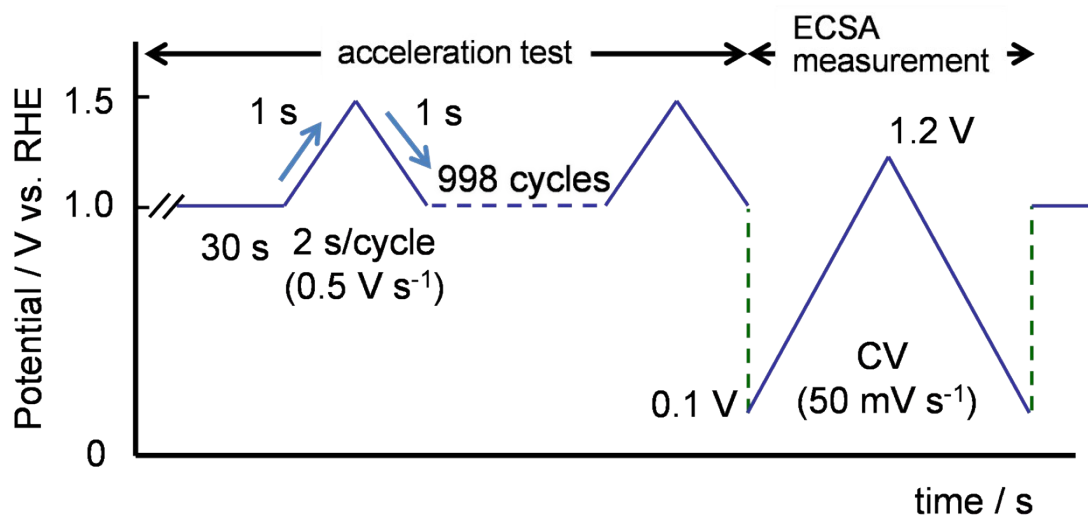

**Figure S1** Protocol of durability test for a half-cell based on the Fuel Cell Commercialization Conference of Japan (FCCJ).

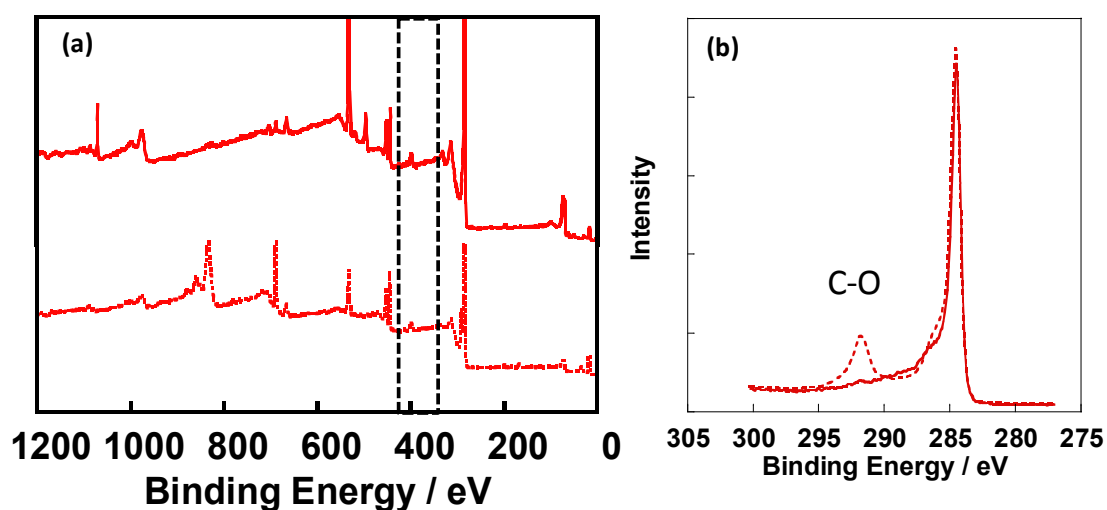

**Figure S2** XPS survey scans of MWNT/PyPBI/Pt cluster before (solid line) and after (dotted line) durability test.

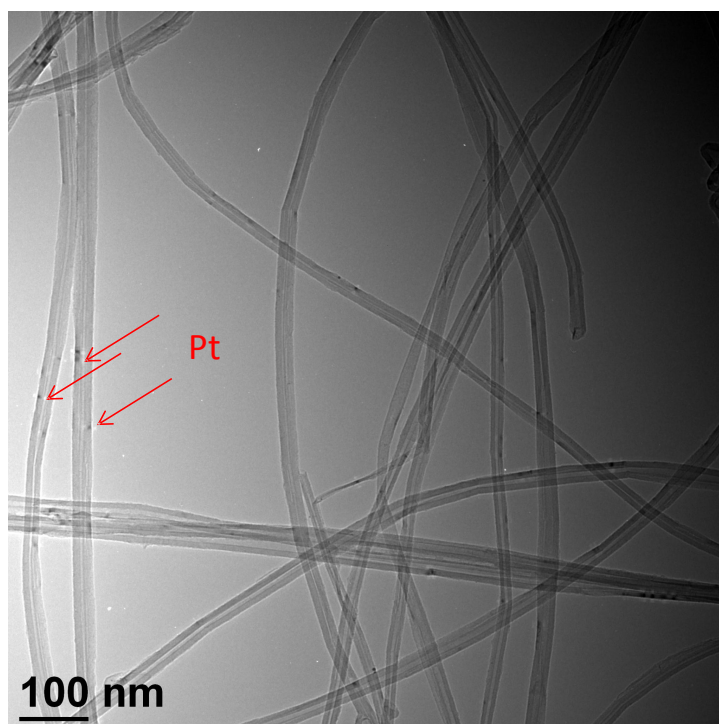

**Figure S3** TEM image of the electrocatalyst synthesized with 2 mL NaOH in EG/water.

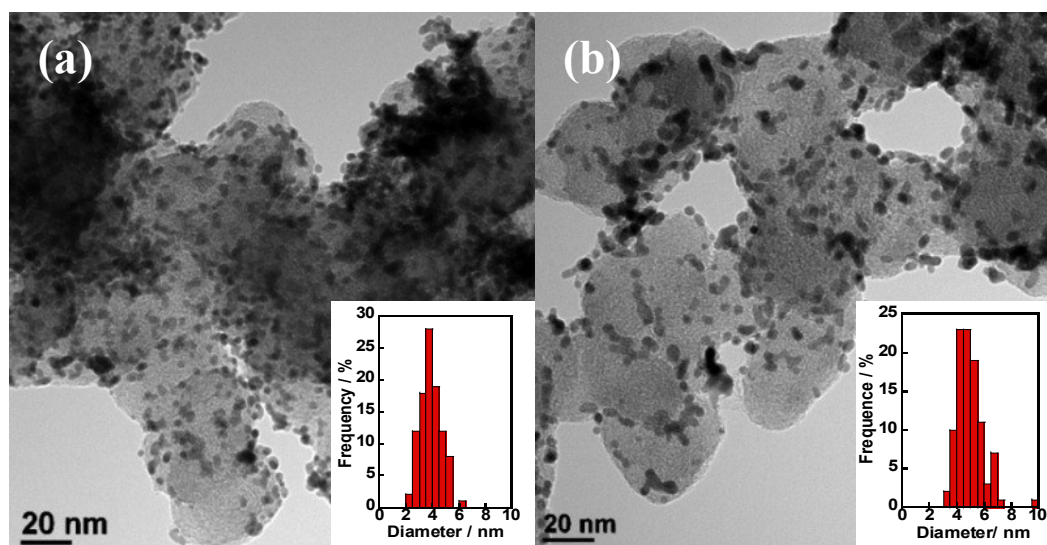

**Figure S4** TEM images of the commercial CB/Pt before (a) and after (b) durability test. Histograms of the particle size distribution (100 particles) were inserted.

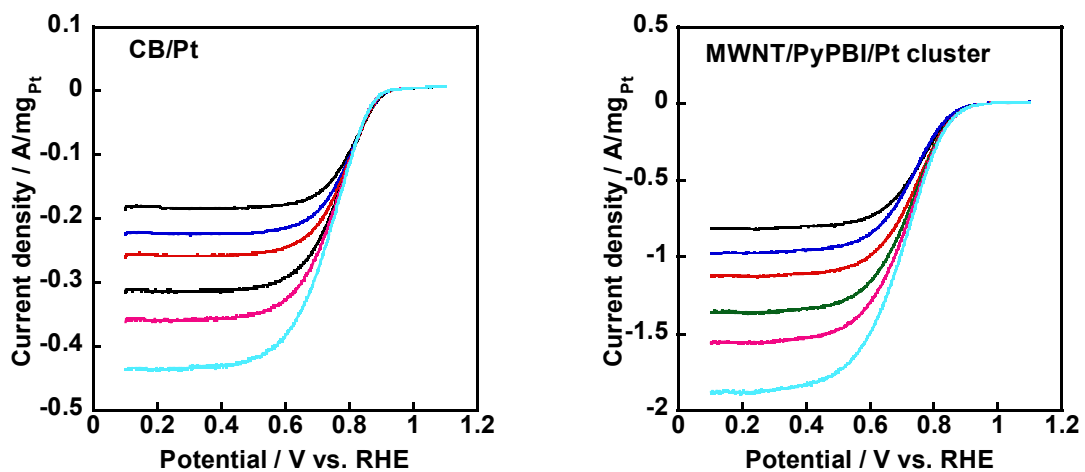

**Figure S5** Rotating disc current density of the different electrocatalysts measured in O<sub>2</sub>-saturated 0.1M HClO<sub>4</sub> solutions at 25 °C.
